# Supplementary material
Source: Springer Nature journal article supplement (https://www.springermedizin.de/resource/supplementary/13054_2012_1056_MOESM2_ESM.pdf/9709886)

**A**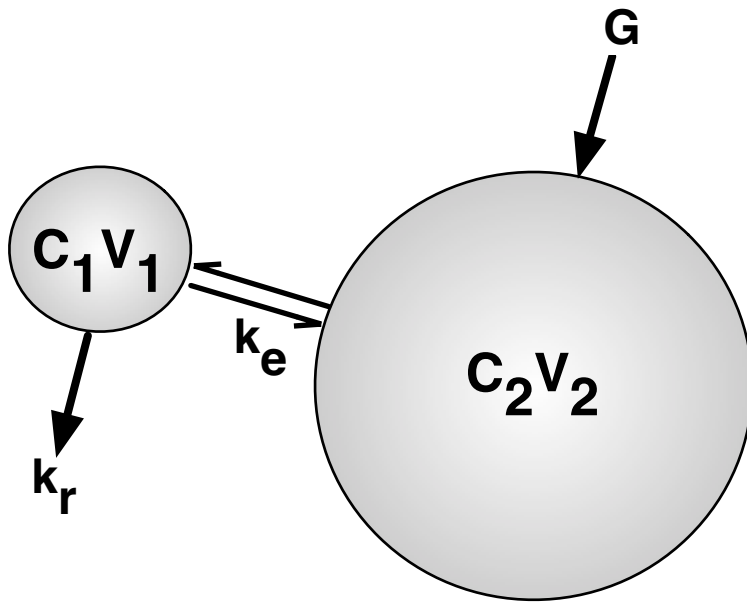**B**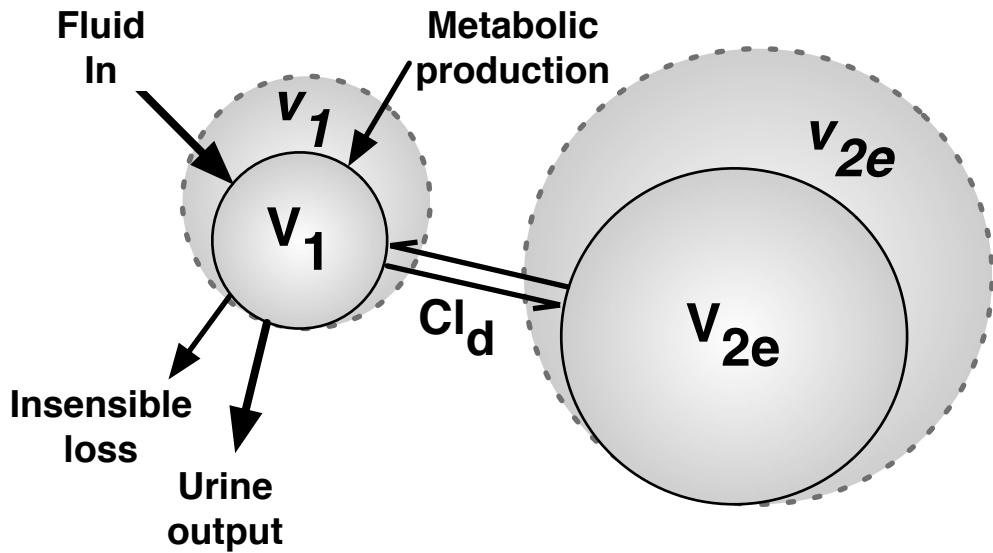

Supplement: MOESM2 [file 9709886]
